# Supplementary material
Source: PubMed Central journal article supplement (PMC4418777)
Supplement: nnr-64-200-s001.pdf [file nnr-64-200-s001.pdf]

Supplementary Digital Content: Individual cultural competence of health care professionals in the COMETH study in Belgium 1  
 between 2010 and 2012 (n = 436), as predicted by the cultural competence of the leaders, by area of cultural competence: complete bivariate and multivariate regression models

**The REG Procedure**  
**Bivariate Model**  
**Dependent Variable: Individual Total Competence**

| Analysis of Variance |     |                |             |         |        |
|----------------------|-----|----------------|-------------|---------|--------|
| Source               | DF  | Sum of Squares | Mean Square | F Value | Pr > F |
| Model                | 1   | 4236.69023     | 4236.69023  | 20.61   | <.0001 |
| Error                | 434 | 89233          | 205.60689   |         |        |
| Corrected Total      | 435 | 93470          |             |         |        |
| Root MSE             |     | 14.33900       | R-Square    | 0.0453  |        |
| Dependent Mean       |     | 45.54587       | Adj R-Sq    | 0.0431  |        |
| Coeff Var            |     | 31.48254       |             |         |        |

| Parameter Estimates     |    |                    |                |         |         |                               |         |         |                    |                       |          |                                                     |          |
|-------------------------|----|--------------------|----------------|---------|---------|-------------------------------|---------|---------|--------------------|-----------------------|----------|-----------------------------------------------------|----------|
| Variable                | DF | Parameter Estimate | Standard Error | t Value | Pr >  t | Heteroscedasticity Consistent |         |         | Variance Inflation | 95% Confidence Limits |          | Heteroscedasticity Consistent 95% Confidence Limits |          |
|                         |    |                    |                |         |         | Standard Error                | t Value | Pr >  t |                    |                       |          |                                                     |          |
| Intercept               | 1  | 28.48494           | 3.82067        | 7.46    | <.0001  | 5.05161                       | 5.64    | <.0001  | 0                  | 20.97563              | 35.99425 | 18.55629                                            | 38.41359 |
| Leader Total Competence | 1  | 0.36746            | 0.08095        | 4.54    | <.0001  | 0.10296                       | 3.57    | 0.0004  | 1.00000            | 0.20836               | 0.52656  | 0.16510                                             | 0.56981  |

**The REG Procedure**  
**Multivariate Model**  
**Dependent Variable Individual Total Competence**

| Analysis of Variance |     |                |             |         |        |
|----------------------|-----|----------------|-------------|---------|--------|
| Source               | DF  | Sum of Squares | Mean Square | F Value | Pr > F |
| Model                | 5   | 8579.92120     | 1715.98424  | 10.97   | <.0001 |
| Error                | 421 | 65827          | 156.35823   |         |        |
| Corrected Total      | 426 | 74407          |             |         |        |
| Root MSE             |     | 12.50433       | R-Square    | 0.1153  |        |
| Dependent Mean       |     | 46.50585       | Adj R-Sq    | 0.1048  |        |
| Coeff Var            |     | 26.88764       |             |         |        |

| Parameter Estimates              |    |                    |                |         |         |                               |         |         |                    |                       |          |                                                     |          |
|----------------------------------|----|--------------------|----------------|---------|---------|-------------------------------|---------|---------|--------------------|-----------------------|----------|-----------------------------------------------------|----------|
| Variable                         | DF | Parameter Estimate | Standard Error | t Value | Pr >  t | Heteroscedasticity Consistent |         |         | Variance Inflation | 95% Confidence Limits |          | Heteroscedasticity Consistent 95% Confidence Limits |          |
|                                  |    |                    |                |         |         | Standard Error                | t Value | Pr >  t |                    |                       |          |                                                     |          |
| Intercept                        | 1  | 38.67002           | 4.01951        | 9.62    | <.0001  | 4.06892                       | 9.50    | <.0001  | 0                  | 30.76921              | 46.57084 | 30.67210                                            | 46.66795 |
| Leader Total Competence          | 1  | 0.06272            | 0.08012        | 0.78    | 0.4342  | 0.07623                       | 0.82    | 0.4111  | 1.13435            | -0.09477              | 0.22021  | -0.08712                                            | 0.21256  |
| Subjective exposure to migration | 1  | 0.12991            | 0.04568        | 2.84    | 0.0047  | 0.04697                       | 2.77    | 0.0059  | 1.03509            | 0.04013               | 0.21970  | 0.03758                                             | 0.22224  |
| Psychiatric service              | 1  | 5.95643            | 1.77594        | 3.35    | 0.0009  | 1.61113                       | 3.70    | 0.0002  | 1.09748            | 2.46561               | 9.44725  | 2.78957                                             | 9.12330  |
| Administrative staff             | 1  | -8.72528           | 1.65940        | -5.26   | <.0001  | 2.33997                       | -3.73   | 0.0002  | 1.00683            | -11.98702             | -5.46354 | -13.32475                                           | -4.12581 |
| Geriatrics                       | 1  | -2.63418           | 1.66216        | -1.58   | 0.1138  | 1.68441                       | -1.56   | 0.1186  | 1.06936            | -5.90135              | 0.63298  | -5.94509                                            | 0.67673  |

**The REG Procedure**  
**Bivariate Model**

**Dependent Variable: Individual Paradigm competence**

| Analysis of Variance |     |                |             |         |        |
|----------------------|-----|----------------|-------------|---------|--------|
| Source               | DF  | Sum of Squares | Mean Square | F Value | Pr > F |
| Model                | 1   | 30.81179       | 30.81179    | 29.37   | <.0001 |
| Error                | 434 | 455.30794      | 1.04910     |         |        |
| Corrected Total      | 435 | 486.11972      |             |         |        |
| Root MSE             |     | 1.02425        | R-Square    | 0.0634  |        |
| Dependent Mean       |     | 2.79298        | Adj R-Sq    | 0.0612  |        |
| Coeff Var            |     | 36.67250       |             |         |        |

| Parameter Estimates        |    |                    |                |         |         |                               |         |         |                    |                       |         |                                                     |         |
|----------------------------|----|--------------------|----------------|---------|---------|-------------------------------|---------|---------|--------------------|-----------------------|---------|-----------------------------------------------------|---------|
| Variable                   | DF | Parameter Estimate | Standard Error | t Value | Pr >  t | Heteroscedasticity Consistent |         |         | Variance Inflation | 95% Confidence Limits |         | Heteroscedasticity Consistent 95% Confidence Limits |         |
|                            |    |                    |                |         |         | Standard Error                | t Value | Pr >  t |                    |                       |         |                                                     |         |
| Intercept                  | 1  | 1.79492            | 0.19058        | 9.42    | <.0001  | 0.19007                       | 9.44    | <.0001  | 0                  | 1.42033               | 2.16950 | 1.42135                                             | 2.16848 |
| Leader Paradigm competence | 1  | 0.35046            | 0.06467        | 5.42    | <.0001  | 0.06323                       | 5.54    | <.0001  | 1.00000            | 0.22336               | 0.47756 | 0.22618                                             | 0.47474 |

**The REG Procedure**  
**Multivariate Model**  
**Dependent Variable: compparadigmteam**

| Analysis of Variance |     |                |             |         |        |
|----------------------|-----|----------------|-------------|---------|--------|
| Source               | DF  | Sum of Squares | Mean Square | F Value | Pr > F |
| Model                | 5   | 61.44847       | 12.28969    | 13.19   | <.0001 |
| Error                | 421 | 392.25001      | 0.93171     |         |        |
| Corrected Total      | 426 | 453.69848      |             |         |        |
| Root MSE             |     | 0.96525        | R-Square    | 0.1354  |        |
| Dependent Mean       |     | 2.81382        | Adj R-Sq    | 0.1252  |        |
| Coeff Var            |     | 34.30398       |             |         |        |

| Parameter Estimates              |    |                    |                |         |         |                               |         |         |                       |          |                                                     |          |
|----------------------------------|----|--------------------|----------------|---------|---------|-------------------------------|---------|---------|-----------------------|----------|-----------------------------------------------------|----------|
| Variable                         | DF | Parameter Estimate | Standard Error | t Value | Pr >  t | Heteroscedasticity Consistent |         |         | 95% Confidence Limits |          | Heteroscedasticity Consistent 95% Confidence Limits |          |
|                                  |    |                    |                |         |         | Standard Error                | t Value | Pr >  t |                       |          |                                                     |          |
| Intercept                        | 1  | 1.77738            | 0.21781        | 8.16    | <.0001  | 0.21636                       | 8.21    | <.0001  | 1.34925               | 2.20550  | 1.35210                                             | 2.20265  |
| Leader Paradigm Competence       | 1  | 0.21726            | 0.07222        | 3.01    | 0.0028  | 0.06830                       | 3.18    | 0.0016  | 0.07530               | 0.35922  | 0.08302                                             | 0.35151  |
| Subjective exposure to migration | 1  | 0.00933            | 0.00375        | 2.49    | 0.0132  | 0.00391                       | 2.39    | 0.0174  | 0.00196               | 0.01669  | 0.00165                                             | 0.01700  |
| Psychiatric service              | 1  | 0.41715            | 0.14633        | 2.85    | 0.0046  | 0.14640                       | 2.85    | 0.0046  | 0.12952               | 0.70478  | 0.12938                                             | 0.70491  |
| Administrative staff             | 1  | -0.63732           | 0.13336        | -4.78   | <.0001  | 0.16495                       | -3.86   | 0.0001  | -0.89946              | -0.37518 | -0.96154                                            | -0.31309 |
| Primary care services            | 1  | 0.28627            | 0.14763        | 1.94    | 0.0532  | 0.13349                       | 2.14    | 0.0326  | -0.00392              | 0.57646  | 0.02388                                             | 0.54865  |

**The REG Procedure**  
**Bivariate Model**

**Dependent Variable: Individual Specificity Competence**

| Analysis of Variance |     |                |             |         |        |
|----------------------|-----|----------------|-------------|---------|--------|
| Source               | DF  | Sum of Squares | Mean Square | F Value | Pr > F |
| Model                | 1   | 13.69418       | 13.69418    | 11.23   | 0.0009 |
| Error                | 434 | 529.17007      | 1.21929     |         |        |
| Corrected Total      | 435 | 542.86425      |             |         |        |
| Root MSE             |     | 1.10421        | R-Square    | 0.0252  |        |
| Dependent Mean       |     | 3.06259        | Adj R-Sq    | 0.0230  |        |
| Coeff Var            |     | 36.05485       |             |         |        |

| Parameter Estimates           |    |                    |                |         |         |                               |         |         |                       |         |                                                     |         |
|-------------------------------|----|--------------------|----------------|---------|---------|-------------------------------|---------|---------|-----------------------|---------|-----------------------------------------------------|---------|
| Variable                      | DF | Parameter Estimate | Standard Error | t Value | Pr >  t | Heteroscedasticity Consistent |         |         | 95% Confidence Limits |         | Heteroscedasticity Consistent 95% Confidence Limits |         |
|                               |    |                    |                |         |         | Standard Error                | t Value | Pr >  t |                       |         |                                                     |         |
| Intercept                     | 1  | 2.15570            | 0.27573        | 7.82    | <.0001  | 0.28798                       | 7.49    | <.0001  | 1.61377               | 2.69762 | 1.58969                                             | 2.72170 |
| Leader Specificity Competence | 1  | 0.28243            | 0.08428        | 3.35    | 0.0009  | 0.08512                       | 3.32    | 0.0010  | 0.11679               | 0.44807 | 0.11514                                             | 0.44973 |

***The REG Procedure***  
***Multivariate Model***  
***Dependent Variable: Individual Specificity Competence***

| Analysis of Variance |     |                |             |         |        |
|----------------------|-----|----------------|-------------|---------|--------|
| Source               | DF  | Sum of Squares | Mean Square | F Value | Pr > F |
| Model                | 5   | 51.22650       | 10.24530    | 9.51    | <.0001 |
| Error                | 421 | 453.76699      | 1.07783     |         |        |
| Corrected Total      | 426 | 504.99349      |             |         |        |
| Root MSE             |     | 1.03819        | R-Square    | 0.1014  |        |
| Dependent Mean       |     | 3.09133        | Adj R-Sq    | 0.0908  |        |
| Coeff Var            |     | 33.58376       |             |         |        |

| Parameter Estimates              |    |                    |                |         |         |                               |         |         |                       |          |                                                     |          |
|----------------------------------|----|--------------------|----------------|---------|---------|-------------------------------|---------|---------|-----------------------|----------|-----------------------------------------------------|----------|
| Variable                         | DF | Parameter Estimate | Standard Error | t Value | Pr >  t | Heteroscedasticity Consistent |         |         | 95% Confidence Limits |          | Heteroscedasticity Consistent 95% Confidence Limits |          |
|                                  |    |                    |                |         |         | Standard Error                | t Value | Pr >  t |                       |          |                                                     |          |
| Intercept                        | 1  | 2.41639            | 0.31902        | 7.57    | <.0001  | 0.32010                       | 7.55    | <.0001  | 1.78931               | 3.04346  | 1.78719                                             | 3.04558  |
| Leader Specificity Competence    | 1  | 0.06726            | 0.09916        | 0.68    | 0.4980  | 0.09274                       | 0.73    | 0.4687  | -0.12765              | 0.26217  | -0.11503                                            | 0.24955  |
| Subjective exposure to migration | 1  | 0.00887            | 0.00390        | 2.28    | 0.0234  | 0.00385                       | 2.30    | 0.0217  | 0.00121               | 0.01653  | 0.00130                                             | 0.01644  |
| Psychiatric service              | 1  | 0.68930            | 0.17120        | 4.03    | <.0001  | 0.14040                       | 4.91    | <.0001  | 0.35279               | 1.02582  | 0.41332                                             | 0.96529  |
| Administrative staff             | 1  | -0.54740           | 0.14384        | -3.81   | 0.0002  | 0.18456                       | -2.97   | 0.0032  | -0.83013              | -0.26468 | -0.91017                                            | -0.18464 |
| Primary care services            | 1  | 0.31368            | 0.16288        | 1.93    | 0.0548  | 0.15592                       | 2.01    | 0.0449  | -0.00647              | 0.63384  | 0.00721                                             | 0.62016  |

**The REG Procedure**  
**Bivariate Model**

**Dependent Variable: Individual Mediation Competence**

| Analysis of Variance |     |                |             |         |        |
|----------------------|-----|----------------|-------------|---------|--------|
| Source               | DF  | Sum of Squares | Mean Square | F Value | Pr > F |
| Model                | 1   | 8.61819        | 8.61819     | 7.33    | 0.0071 |
| Error                | 434 | 510.43128      | 1.17611     |         |        |
| Corrected Total      | 435 | 519.04947      |             |         |        |
| Root MSE             |     | 1.08449        | R-Square    | 0.0166  |        |
| Dependent Mean       |     | 3.06204        | Adj R-Sq    | 0.0143  |        |
| Coeff Var            |     | 35.41714       |             |         |        |

| Parameter Estimates         |    |                    |                |         |         |                               |         |         |                       |         |                                                     |         |
|-----------------------------|----|--------------------|----------------|---------|---------|-------------------------------|---------|---------|-----------------------|---------|-----------------------------------------------------|---------|
| Variable                    | DF | Parameter Estimate | Standard Error | t Value | Pr >  t | Heteroscedasticity Consistent |         |         | 95% Confidence Limits |         | Heteroscedasticity Consistent 95% Confidence Limits |         |
|                             |    |                    |                |         |         | Standard Error                | t Value | Pr >  t |                       |         |                                                     |         |
| Intercept                   | 1  | 2.25198            | 0.30372        | 7.41    | <.0001  | 0.30853                       | 7.30    | <.0001  | 1.65504               | 2.84893 | 1.64558                                             | 2.85838 |
| Leader Mediation Competence | 1  | 0.26203            | 0.09680        | 2.71    | 0.0071  | 0.09773                       | 2.68    | 0.0076  | 0.07178               | 0.45228 | 0.06994                                             | 0.45411 |

***The REG Procedure***  
***Multivariate Model***

***Dependent Variable: Individual Mediation Competence***

| Analysis of Variance |     |                |             |         |        |
|----------------------|-----|----------------|-------------|---------|--------|
| Source               | DF  | Sum of Squares | Mean Square | F Value | Pr > F |
| Model                | 4   | 51.38789       | 12.84697    | 11.72   | <.0001 |
| Error                | 426 | 467.05089      | 1.09636     |         |        |
| Corrected Total      | 430 | 518.43877      |             |         |        |
| Root MSE             |     | 1.04707        | R-Square    | 0.0991  |        |
| Dependent Mean       |     | 3.05800        | Adj R-Sq    | 0.0907  |        |
| Coeff Var            |     | 34.24043       |             |         |        |

| Parameter Estimates         |    |                    |                |         |         |                               |         |         |                       |          |                                                     |          |
|-----------------------------|----|--------------------|----------------|---------|---------|-------------------------------|---------|---------|-----------------------|----------|-----------------------------------------------------|----------|
| Variable                    | DF | Parameter Estimate | Standard Error | t Value | Pr >  t | Heteroscedasticity Consistent |         |         | 95% Confidence Limits |          | Heteroscedasticity Consistent 95% Confidence Limits |          |
|                             |    |                    |                |         |         | Standard Error                | t Value | Pr >  t |                       |          |                                                     |          |
| Intercept                   | 1  | 2.47726            | 0.29835        | 8.30    | <.0001  | 0.28608                       | 8.66    | <.0001  | 1.89085               | 3.06368  | 1.91496                                             | 3.03957  |
| Leader Mediation Competence | 1  | 0.21838            | 0.09561        | 2.28    | 0.0229  | 0.09205                       | 2.37    | 0.0181  | 0.03046               | 0.40630  | 0.03746                                             | 0.39930  |
| Administrative staff        | 1  | -0.73893           | 0.13843        | -5.34   | <.0001  | 0.17674                       | -4.18   | <.0001  | -1.01103              | -0.46684 | -1.08632                                            | -0.39155 |
| Paramedics                  | 1  | -0.38001           | 0.15771        | -2.41   | 0.0164  | 0.14526                       | -2.62   | 0.0092  | -0.68999              | -0.07003 | -0.66552                                            | -0.09450 |
| Psychiatric services        | 1  | 0.49500            | 0.14369        | 3.44    | 0.0006  | 0.13809                       | 3.58    | 0.0004  | 0.21257               | 0.77743  | 0.22357                                             | 0.76643  |



*The REG Procedure*

*Bivariate Model*

*Dependent Variable: Individual Organization Competence*

| Analysis of Variance |     |                |             |         |        |
|----------------------|-----|----------------|-------------|---------|--------|
| Source               | DF  | Sum of Squares | Mean Square | F Value | Pr > F |
| Model                | 1   | 2.58125        | 2.58125     | 2.10    | 0.1484 |
| Error                | 434 | 534.52239      | 1.23162     |         |        |
| Corrected Total      | 435 | 537.10364      |             |         |        |
| Root MSE             |     | 1.10978        | R-Square    | 0.0048  |        |
| Dependent Mean       |     | 3.24537        | Adj R-Sq    | 0.0025  |        |
| Coeff Var            |     | 34.19592       |             |         |        |

| Parameter Estimates            |    |                    |                |         |         |                               |         |         |                       |         |                                                     |         |
|--------------------------------|----|--------------------|----------------|---------|---------|-------------------------------|---------|---------|-----------------------|---------|-----------------------------------------------------|---------|
| Variable                       | DF | Parameter Estimate | Standard Error | t Value | Pr >  t | Heteroscedasticity Consistent |         |         | 95% Confidence Limits |         | Heteroscedasticity Consistent 95% Confidence Limits |         |
|                                |    |                    |                |         |         | Standard Error                | t Value | Pr >  t |                       |         |                                                     |         |
| Intercept                      | 1  | 2.82584            | 0.29462        | 9.59    | <.0001  | 0.29836                       | 9.47    | <.0001  | 2.24678               | 3.40491 | 2.23944                                             | 3.41224 |
| Leader Organization Competence | 1  | 0.12627            | 0.08722        | 1.45    | 0.1484  | 0.08594                       | 1.47    | 0.1425  | -0.04516              | 0.29771 | -0.04264                                            | 0.29519 |

***The REG Procedure***  
***Multivariate Model***  
***Dependent Variable: Individual Organization Competence***

| Analysis of Variance |     |                |             |         |        |
|----------------------|-----|----------------|-------------|---------|--------|
| Source               | DF  | Sum of Squares | Mean Square | F Value | Pr > F |
| Model                | 4   | 42.96118       | 10.74029    | 10.04   | <.0001 |
| Error                | 422 | 451.39375      | 1.06965     |         |        |
| Corrected Total      | 426 | 494.35493      |             |         |        |
| Root MSE             |     | 1.03424        | R-Square    | 0.0869  |        |
| Dependent Mean       |     | 3.27791        | Adj R-Sq    | 0.0782  |        |
| Coeff Var            |     | 31.55185       |             |         |        |

| Parameter Estimates              |    |                    |                |         |         |                               |         |         |                       |          |                                                     |          |
|----------------------------------|----|--------------------|----------------|---------|---------|-------------------------------|---------|---------|-----------------------|----------|-----------------------------------------------------|----------|
| Variable                         | DF | Parameter Estimate | Standard Error | t Value | Pr >  t | Heteroscedasticity Consistent |         |         | 95% Confidence Limits |          | Heteroscedasticity Consistent 95% Confidence Limits |          |
|                                  |    |                    |                |         |         | Standard Error                | t Value | Pr >  t |                       |          |                                                     |          |
| Intercept                        | 1  | 2.71210            | 0.31619        | 8.58    | <.0001  | 0.31425                       | 8.63    | <.0001  | 2.09060               | 3.33359  | 2.09441                                             | 3.32979  |
| Leader Organization Competence   | 1  | 0.08851            | 0.08579        | 1.03    | 0.3028  | 0.08364                       | 1.06    | 0.2906  | -0.08011              | 0.25714  | -0.07590                                            | 0.25292  |
| Subjective exposure to migration | 1  | 0.01012            | 0.00379        | 2.67    | 0.0079  | 0.00381                       | 2.66    | 0.0081  | 0.00267               | 0.01758  | 0.00264                                             | 0.01760  |
| Administrative staff             | 1  | -0.74262           | 0.13974        | -5.31   | <.0001  | 0.18200                       | -4.08   | <.0001  | -1.01729              | -0.46795 | -1.10036                                            | -0.38487 |
| Intensive care unit              | 1  | -0.19452           | 0.10927        | -1.78   | 0.0758  | 0.10622                       | -1.83   | 0.0678  | -0.40930              | 0.02026  | -0.40332                                            | 0.01427  |

***The REG Procedure***  
***Bivariate Model***  
***Dependent Variable: Individual Communication Competence***

| Analysis of Variance |     |                |             |         |        |
|----------------------|-----|----------------|-------------|---------|--------|
| Source               | DF  | Sum of Squares | Mean Square | F Value | Pr > F |
| Model                | 1   | 0.00050620     | 0.00050620  | 0.00    | 0.9829 |
| Error                | 434 | 477.38158      | 1.09996     |         |        |
| Corrected Total      | 435 | 477.38208      |             |         |        |
| Root MSE             |     | 1.04879        | R-Square    | 0.0000  |        |
| Dependent Mean       |     | 3.40238        | Adj R-Sq    | -0.0023 |        |
| Coeff Var            |     | 30.82513       |             |         |        |

| Parameter Estimates             |    |                    |                |         |         |                               |         |         |                       |         |                                                     |         |
|---------------------------------|----|--------------------|----------------|---------|---------|-------------------------------|---------|---------|-----------------------|---------|-----------------------------------------------------|---------|
| Variable                        | DF | Parameter Estimate | Standard Error | t Value | Pr >  t | Heteroscedasticity Consistent |         |         | 95% Confidence Limits |         | Heteroscedasticity Consistent 95% Confidence Limits |         |
|                                 |    |                    |                |         |         | Standard Error                | t Value | Pr >  t |                       |         |                                                     |         |
| Intercept                       | 1  | 3.39447            | 0.37210        | 9.12    | <.0001  | 0.33776                       | 10.05   | <.0001  | 2.66314               | 4.12581 | 2.73062                                             | 4.05833 |
| Leader Communication Competence | 1  | 0.00221            | 0.10280        | 0.02    | 0.9829  | 0.09100                       | 0.02    | 0.9807  | -0.19985              | 0.20426 | -0.17665                                            | 0.18107 |

***The REG Procedure***  
***Multivariate Model***  
***Dependent Variable: Individual Communication Competence***

| Analysis of Variance |     |                |             |         |        |
|----------------------|-----|----------------|-------------|---------|--------|
| Source               | DF  | Sum of Squares | Mean Square | F Value | Pr > F |
| Model                | 5   | 34.57185       | 6.91437     | 7.39    | <.0001 |
| Error                | 421 | 393.96445      | 0.93578     |         |        |
| Corrected Total      | 426 | 428.53630      |             |         |        |
| Root MSE             |     | 0.96736        | R-Square    | 0.0807  |        |
| Dependent Mean       |     | 3.44145        | Adj R-Sq    | 0.0698  |        |
| Coeff Var            |     | 28.10902       |             |         |        |

| Parameter Estimates              |    |                    |                |         |         |                               |         |         |                       |          |                                                     |          |
|----------------------------------|----|--------------------|----------------|---------|---------|-------------------------------|---------|---------|-----------------------|----------|-----------------------------------------------------|----------|
| Variable                         | DF | Parameter Estimate | Standard Error | t Value | Pr >  t | Heteroscedasticity Consistent |         |         | 95% Confidence Limits |          | Heteroscedasticity Consistent 95% Confidence Limits |          |
|                                  |    |                    |                |         |         | Standard Error                | t Value | Pr >  t |                       |          |                                                     |          |
| Intercept                        | 1  | 3.30490            | 0.41199        | 8.02    | <.0001  | 0.39274                       | 8.41    | <.0001  | 2.49508               | 4.11472  | 2.53292                                             | 4.07688  |
| Leader Communication Competence  | 1  | -0.01014           | 0.09893        | -0.10   | 0.9184  | 0.09250                       | -0.11   | 0.9127  | -0.20461              | 0.18432  | -0.19197                                            | 0.17168  |
| Administrative staff             | 1  | -0.71118           | 0.13066        | -5.44   | <.0001  | 0.18296                       | -3.89   | 0.0001  | -0.96800              | -0.45437 | -1.07081                                            | -0.35156 |
| Paramedics                       | 1  | -0.31496           | 0.14619        | -2.15   | 0.0318  | 0.12535                       | -2.51   | 0.0124  | -0.60231              | -0.02761 | -0.56135                                            | -0.06857 |
| Subjective exposure to migration | 1  | 0.00648            | 0.00349        | 1.86    | 0.0639  | 0.00347                       | 1.87    | 0.0622  | -0.00037531           | 0.01334  | -0.00033220                                         | 0.01330  |
| Psychiatric services             | 1  | 0.21700            | 0.13516        | 1.61    | 0.1091  | 0.13170                       | 1.65    | 0.1002  | -0.04868              | 0.48268  | -0.04187                                            | 0.47587  |
